# Supplementary material
Source: PubMed Central journal article supplement (PMC166230)
Supplement: pnas_100_14_8337__4.pdf [file pnas_100_14_8337__4.pdf]

NM\_173858

Pseudogene allele

```
ATG TTG AAA TTG GTT ATT ATT GAG AAC ATG GCA GAA ATT ATG CTA TTC TCA TTA GAT CTC
... ..
TTG CTT TTC TCC ACA GAT ATC CTT TGC TTT AAT TTT CCT TCT AAG ATG ATC AAA CTT CCT
... ..
GGT TTT ATT ACC ATA CAA ATC TTC TTT TAT CCA CAA GCC AGC TTT GGA ATT TCA GCA AAC
... ..
ACC ATC CTT CTT CTT TTC CAC ATC TTC ACC TTT GTT TTC AGT CAC AGG TCT AAG TCC ATT
... ..
GAC ATG ATA ATT AGT CAC CTG TCT CTC ATC CAC ATA CTG CTG CTC TTC ACT CAG GCA ATA
... ..
TTG GTG TCC TTA GAC TTC TTT GGT TCA CAG AAT ACT CAG GAT GAT CTT AGG TAT AAG GTC
... ..
ATT GTC TTT TTA AAC AAG GTG ATG AGG GGC CTC TCC ATC TGC ACC CCC TGC CTC CTG AGT
... ..
GTG CTC CAG GCC ATC ATC AGC CCC AGC ATC TTC TCC TTG GCA AAG CTC AAA CAT CCT TCT
... ..
GCA AGT CAC ATC TTA GGA TTC TTC CTT TTC TCA TGG GTC CTC AAC ATG TTC ATT GGT GTA
... ..
ATC TTC TGC TGT ACA CTG CGG CTA CCC CCA GTG AAA CGG GGC CAG TCT TCT GTT TGT CAT
... ..
ACA GCA CTG TTC CTT TTT GCC CAT GAG CTA CAC CCA CAG GAG ACT GTT TTT CAC ACT AAT
... ..
GAC TTT GAG GGA TGT CAC CTT TAT AGG GTT CAT GGT CCT CTC AAG AGG CTA CAT GGT GAT
... ..
TAT TTT ATA CAG ACA ATA AGA GGC TAT CTC AGT GCC TTC ACA CAG CCA GCC TGT CCC CGA
... ..
GTC TCA CCA GTG AAA AGA GCC TCC CAG GCT ATC TTA CTG CTG GTG AGT TTT GTC TTC ACA
... ..
TAC TGG GTG GAC TTT ACG TTC TCA TTT TCA GGA GGT GTG ACA TGG ATA AAT GAT TCT CTG
... ..
CTA GTG TGG CTC CAG GTT ATT GTG GCC AAT AGC TAT GCC GCA ATT AGT CCT TTG ATG CTA
... ..
ATT TAT GCT GAT AAC CAA ATA TTC AAG ACT CTG CAA ATG TTA TGG TTT AAA TAT TTG TCT
... ..
CCT CCA AAG CTC ATG TTG AAA TTT AAT CGC CAA TGT GGC AGT ACT AAG AAG TGA
... ..
```
