# Supplementary material
Source: PubMed Central journal article supplement (PMC166230)
Supplement: pnas_100_14_8337__6.pdf [file pnas_100_14_8337__6.pdf]

AF336873  
Pseudogene allele

```
ATG GCC TCC AAG GAT TTT GCA ATA GGC ATG ATC TTA TTA TCT CAG ATC ATG GTC GGA TTC
... ..

CTG GGG AAT TTC TTT CTT CTC TAC CAC TAT AGT TTC CTT TGT TTC ACC AGA GGT ATG TTA
... ..

CAG TCC ACA GAT CTG ATT CTC AAG CAC CTG ACC ATA GCC AAC TCC TTG GTT ATA CTC TCT
... ..

AAA GGA ATC CCA CAA ACA ATG GCT GCT TTT GGG TTG AAA GAT TCC CTC AGT GAT ATT GGA
... ..

TGC AAA TTT GTG TTT TAT GTT CAC AGA GTG GGC AGG GCT GTG TGC GTT GGC AAT GCC TGC
... .. A-- --- --- --- ---

CTC CTG AGT GTC TTT CAG GTC ATC ACC ATC AGC CCC AGT GAA TTC AGG TGG GCA GAG CTG
--- ... ..C ... .. [..] ... ..

AAG CTA CAT GCT CAC AAA TAC ATC AGG TCT TTT ATC CTG GTC CTG TGC TGG ATT CTG AAC
... ..

ACG CTG GTA AAT ATT ACT GTT CTT CTA CAT GTG ACT GGC AAG TGG AAC AGC ATA AAT AGC
... .. [..]

ACA AAG ACA AAT GAT TAT GGA TAT TGT TCT GGA GGA AGT AGG AGC AGA ATT CCA CAT TCA
... .. [..] [..]

TTA CAT ATT GTC TTG TTA TCA TCC CTT GAT GTT TTG TGT TTG GGG CTC ATG ACC TTG GCC
... .. [..]

AGT GGC TCC ATG GTT TTT ATC CTG CAC AGG CAC AAG CAG CAG GTC CAG CAC ATT CAT GGG
... ..

ACC AAC CTC TCC GCC AGA TCC TCC CCT GAG TCC AGA GTC ACC CAA AGC ATC CTG GTC CTG
... .. [..]

GTG AGC ACC TTG TGT TAC TTT ACT CGC TCT CCT CCA TCT TTA CAT ATG TCT CTT TTT CCT
... .. [ ]

AAT CCC AGT TGG TGG CTG TTG AAC ACC TCT GCA CTG ATC ACT GCC TGT TTT CCC ATG GTC
[..] ... ..

AGC CCC TTT GTG CTC ATG AGC CGC CAT CCC AGG ATA CCC AGG CTG GGC TCT GCC TGC TGT
... ..

GGA AGG AAT CCA CAG TTT CCT AAG CTG GTC AGA TAG
... .. [..] ... ..
```
