# Supplementary material
Source: PubMed Central journal article supplement (PMC166230)

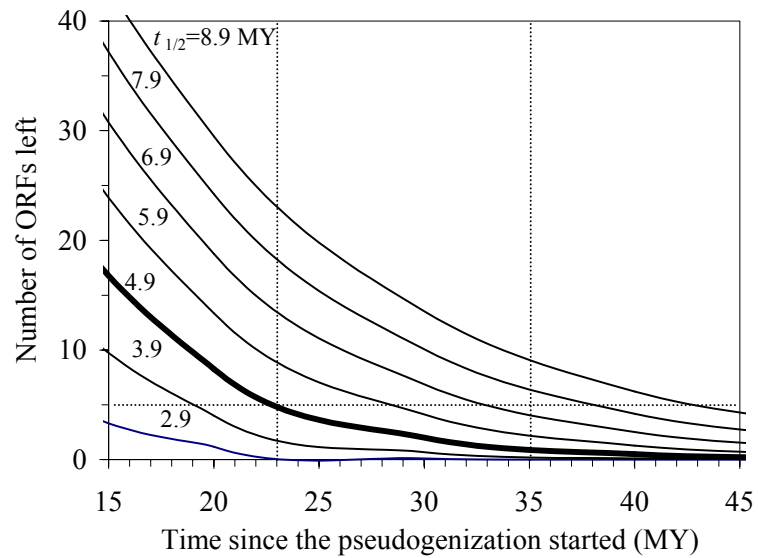

Supplement: pnas_100_14_8337__2.pdf [file pnas_100_14_8337__2.pdf]
